# Supplementary material for: Zn(ii)-cyclen complex-based liposomes for gene delivery: the advantage of Zn coordination
Source: Royal Society of Chemistry journal article supplement (doi:10.1039/c9nj03242h), 2019-01-01
Supplement: c9nj03242h1.pdf [file c9nj03242h1.pdf]

*New Journal of Chemistry*

**Supplementary information**

**Zn(II)-cyclen complex-based liposomes for gene delivery: the  
advantage of Zn coordination**

Yu Guo, Qing-Ying Yu, Ji Zhang\*, Hui-Zhen Yang, Zheng Huang and Xiao-Qi Yu\*

*Key Laboratory of Green Chemistry and Technology (Ministry of Education), College of Chemistry, Sichuan University, Chengdu 610064, P. R. China*

\*Corresponding authors: jzhang@scu.edu.cn (J. Zhang); xqyu@scu.edu.cn (X.-Q. Yu); Fax: + 86 28 85415886

**Table S1** Zinc concentration of lipid solution measured by ICP-AES.

|                                                    | ZnL4 | ZnL5 |
|----------------------------------------------------|------|------|
| Theoretical zinc concentration ( $\mu\text{g/L}$ ) | 10   | 20   |
| Measured zinc concentration ( $\mu\text{g/L}$ )    | 9.85 | 16.5 |

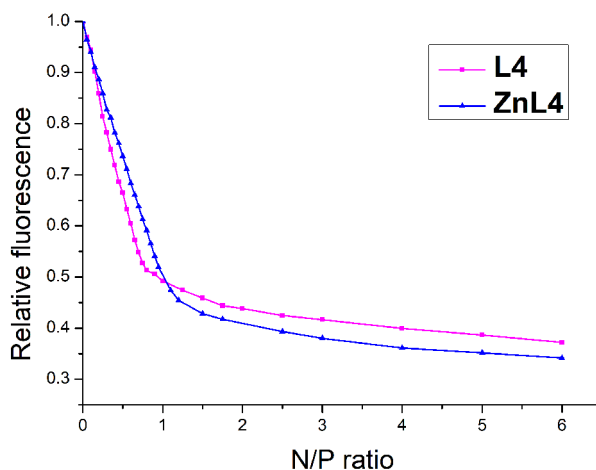

**Fig. S1** Florescent quenching assay of EB/DNA by the addition of lipids **L4** & **L4(Zn)**. The samples were excited at 520 nm and the emission were measured at 600 nm. The pure EB solution and DNA-EB solution without the liposome were measured as negative and positive controls.

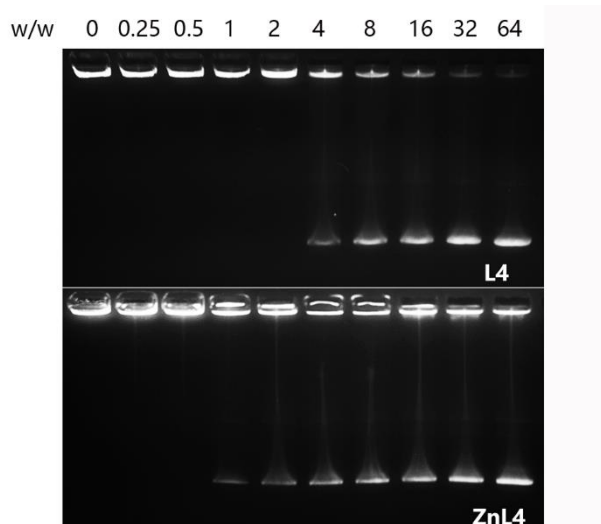

**Fig. S2** Release of DNA from the lipoplex ( $N/P = 8$  with  $0.125 \mu\text{g}$  of pUC-19 DNA) with the addition of heparin with various heparin/DNA mass ratios.

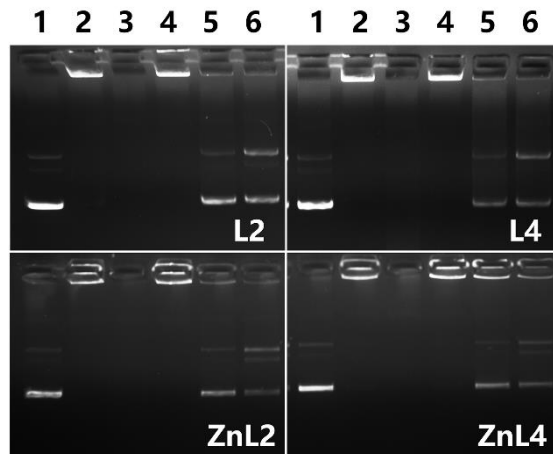

**Fig. S3** DNA protection by liposomes against DNase. Lane 1: naked DNA; lane 2: lipoplex (N/P = 8); lane 3: DNA with DNase for 2 h; lane 4: lipoplex (N/P = 8) with DNase for 2 h; lane 5: lipoplex (N/P = 8) treated with heparin; lane 6: lipoplex (N/P = 8) with DNase for 2 h followed by heat-inactivation of DNase and then treated with heparin. 0.125  $\mu$ g of pUC-19 DNA was used in each well.

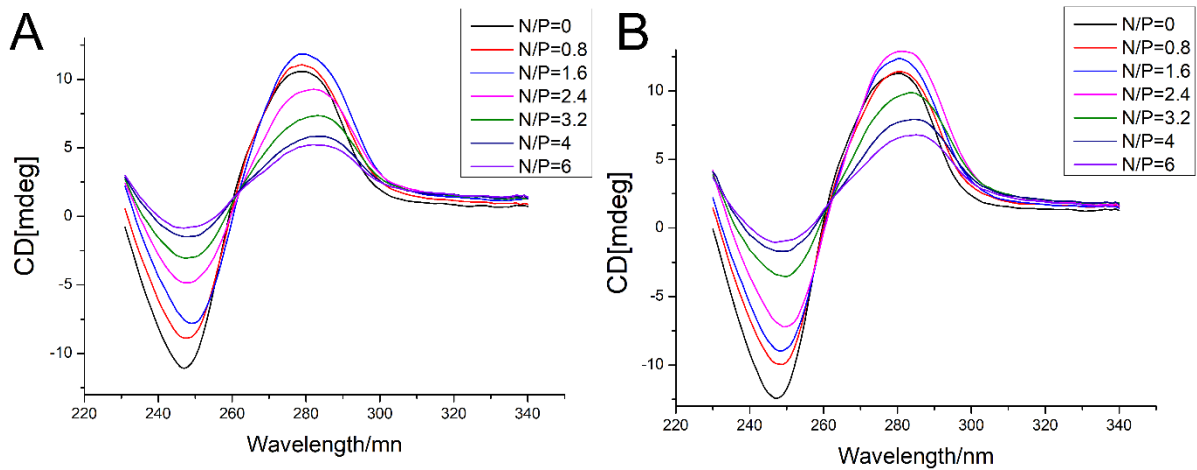

**Fig. S4** Circular dichroism spectra of CT-DNA combined with liposomes **L4**(A) or **ZnL4**(B) at different N/P ratio in 10 mM of HEPES (pH 7.2) at 25  $^{\circ}$ C.

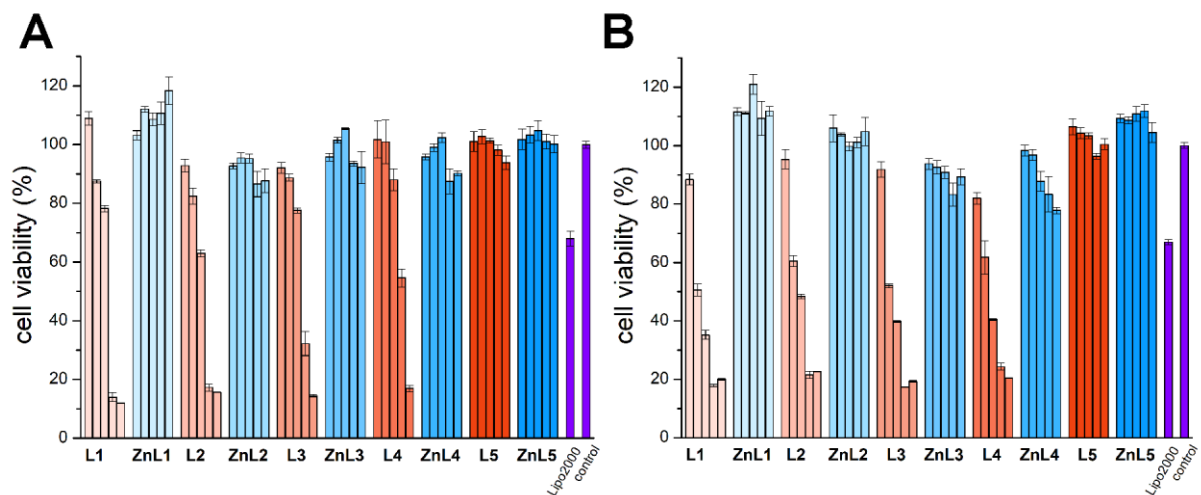

**Fig. S5** *In vitro* cytotoxicity of the lipoplexes at various N/P ratios (4, 6, 8, 12 and 16 in each column group, respectively) in 7702 (A) and HEK-293 (B) cells. Lipoplexes were prepared with 0.2  $\mu$ g of pGL-3 plasmid at various N/P ratios. Data represent mean  $\pm$  SD (n = 3).

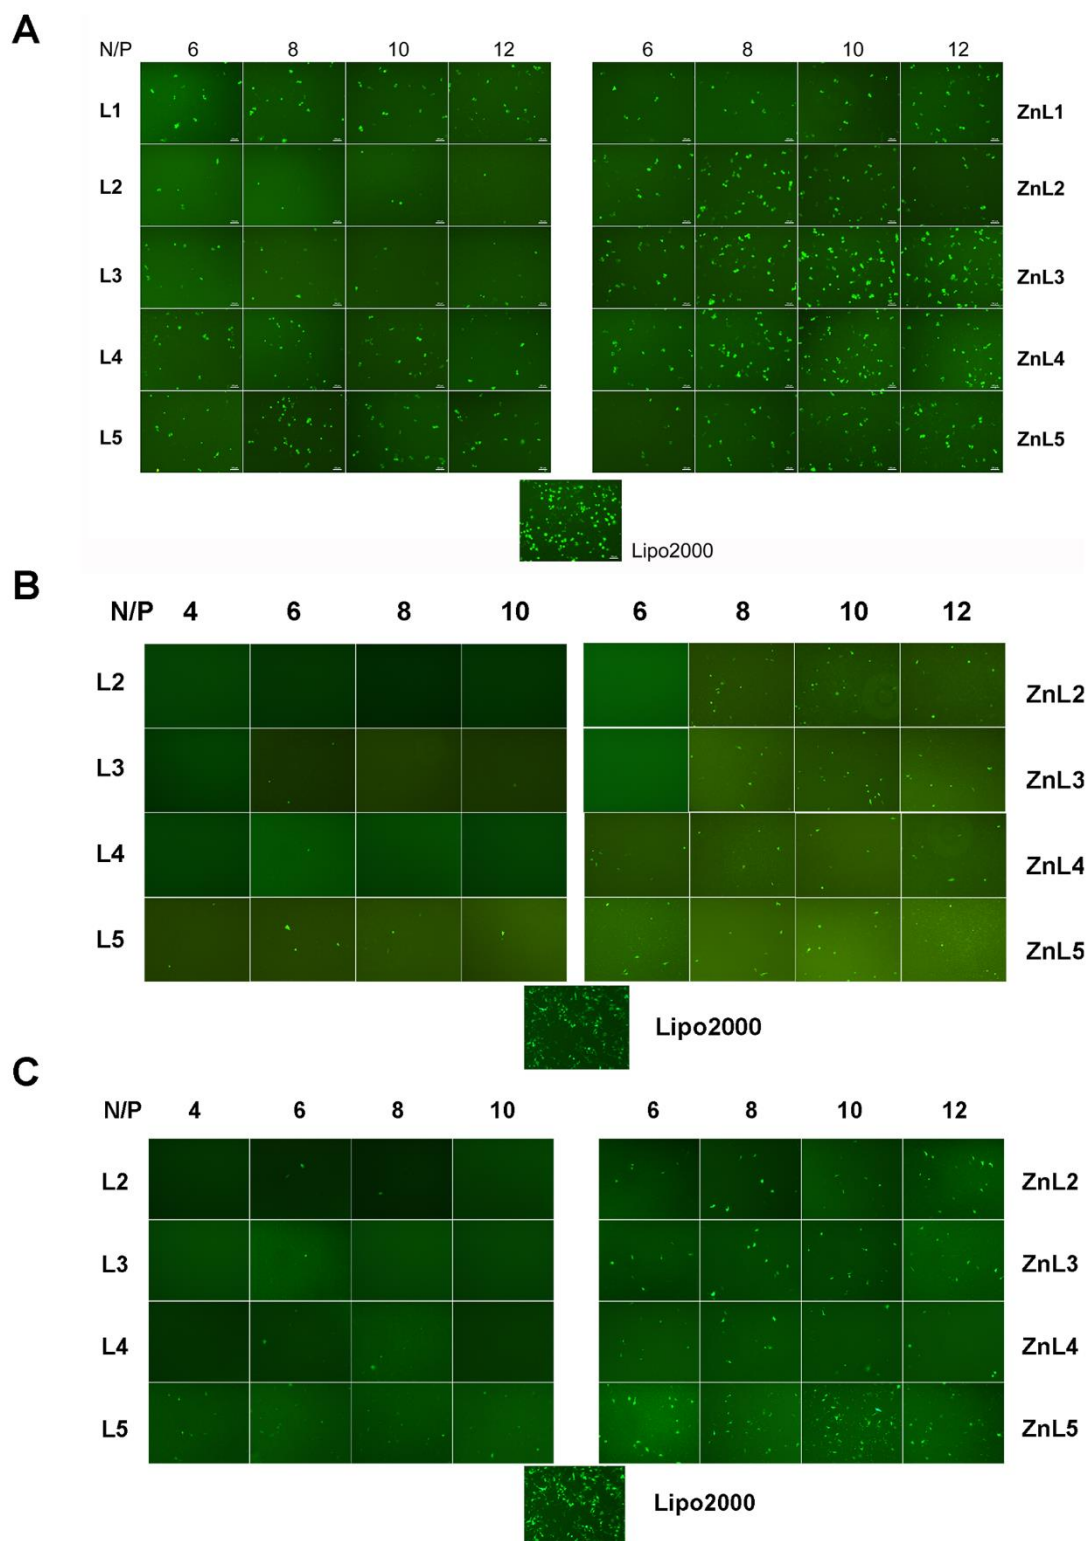

**Fig. S6** Fluorescence microscopy images of 7402 (A), 7702 (B) and HEK-293 (C) cells transfected by EGFP (0.4  $\mu$ g of plasmid in each well) with Zn-free and Zn-contained liposomes at different N/P ratios. (Lipid/DOPE ratio was 1:2, the cells were observed after 24 h transfection).

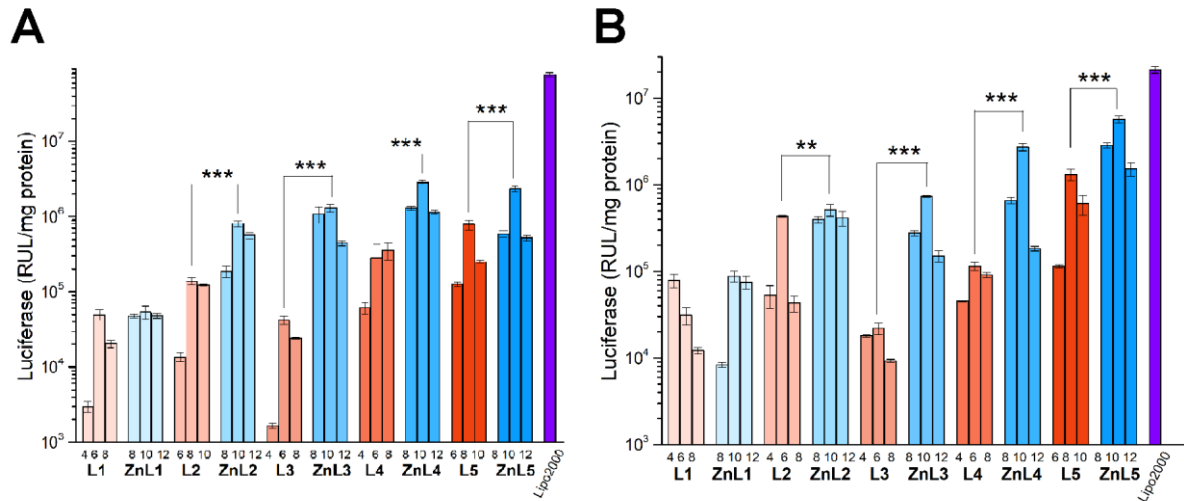

**Fig. S7** Luciferase expression in 7702 (A) and HEK-293 (B) cells transfected with liposome/DNA lipoplexes at various N/P ratios at the lipid/DOPE molar ratio of 1:2, while 0.4  $\mu$ g of pGL-3 plasmid was used in each experiment. Data represent mean  $\pm$  SD (n = 3). \*P < 0.05; \*\*P < 0.01; \*\*\*P < 0.001.

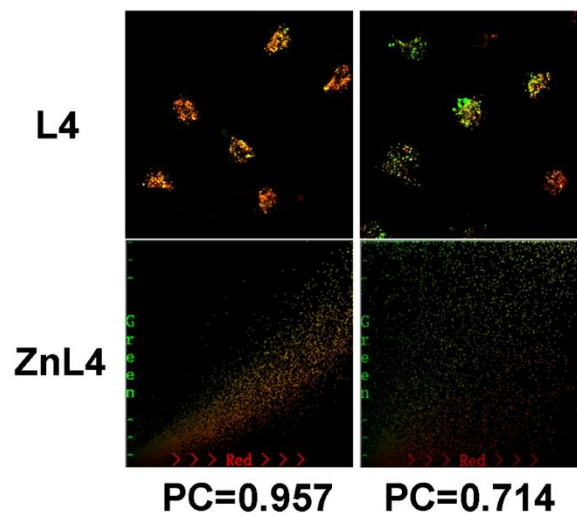

**Fig. S8** Color co-localization image and Pearson correlation coefficient of green and red signals in Fig. 7. PC: Pearson correlation coefficient. The result was analyzed by Image-Pro Plus 6.0.
